# Supplementary material
Source: PubMed Central journal article supplement (PMC8228445)

**CD206 DAPI (day 3)**

**CD206 DAPI (day 14)**

**CARRIER**

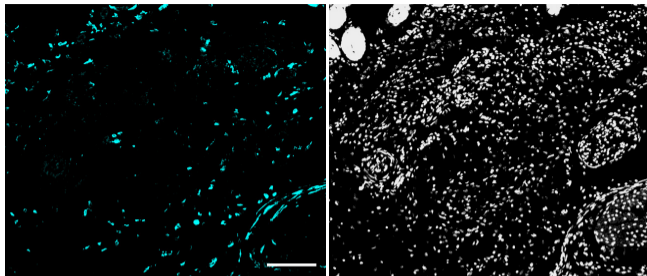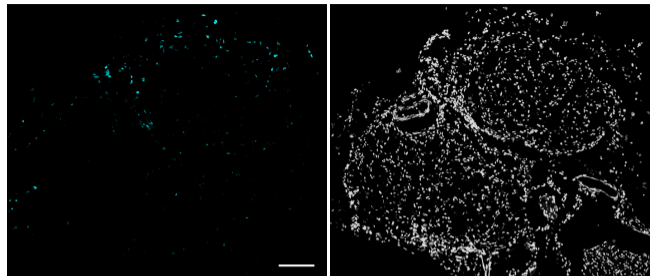

**AP20187**

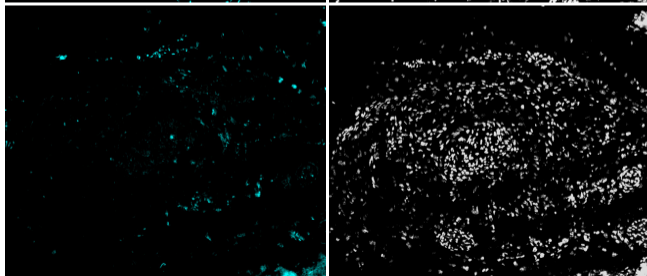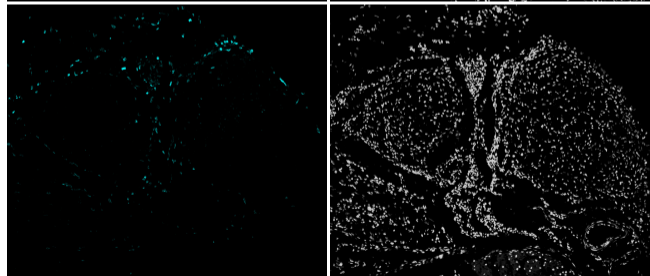

**FIGURE S1**

Supplement: NIHMS1713320-supplement-fS1.pdf [file NIHMS1713320-supplement-fS1.pdf]

ScxGFP DAPI (D14)

CARRIER

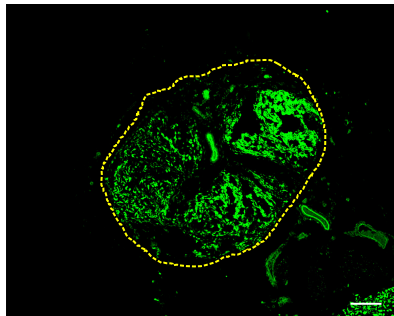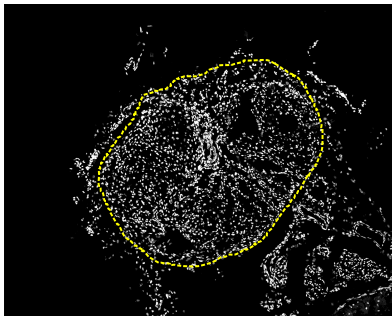

AP20187

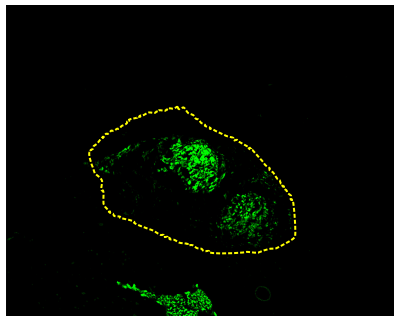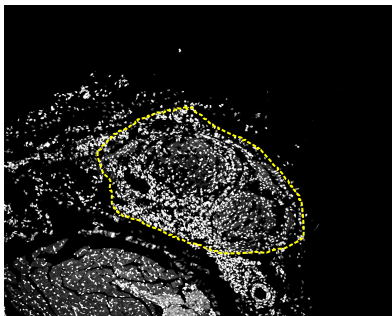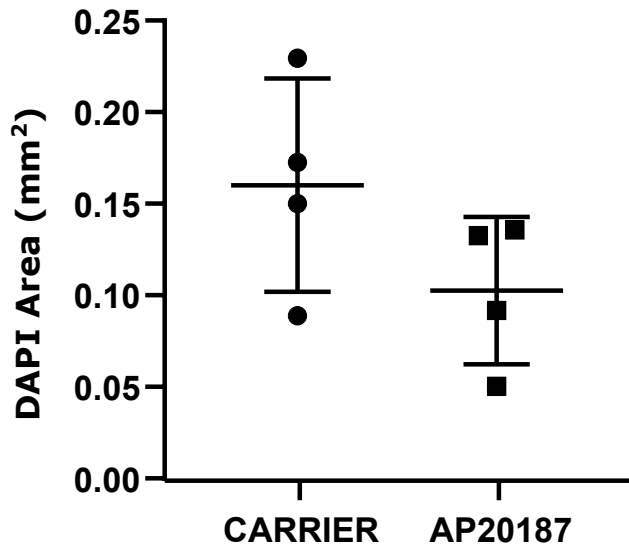

FIGURE S2

Supplement: NIHMS1713320-supplement-fS2.pdf [file NIHMS1713320-supplement-fS2.pdf]

**ScxGFP** **Laminin** (D14)

**CARRIER**

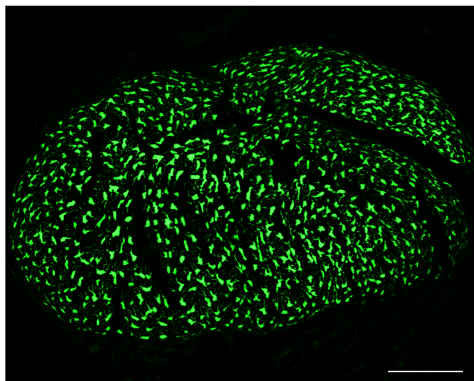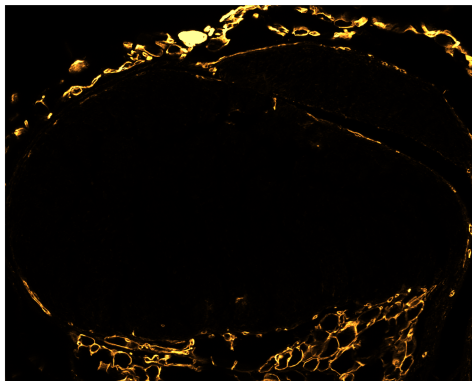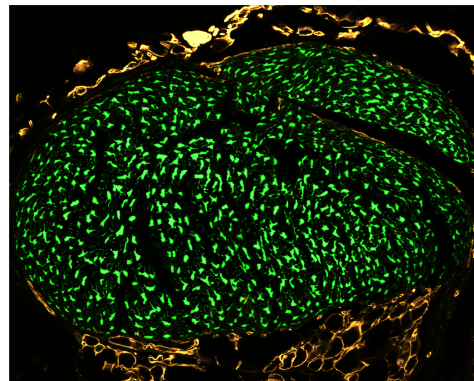

**AP20187**

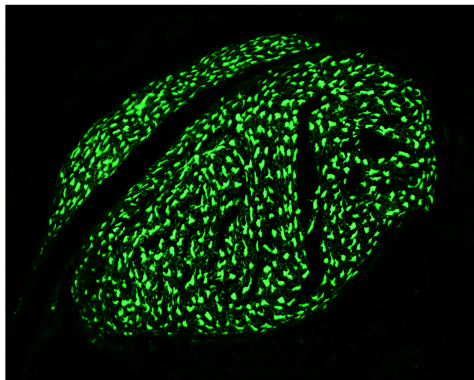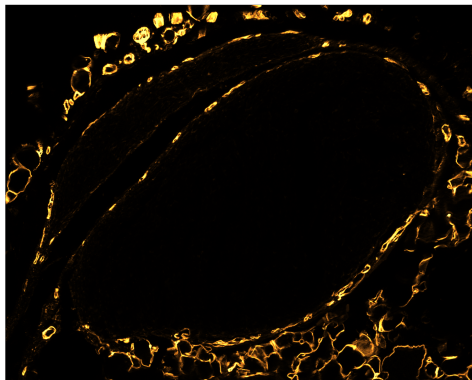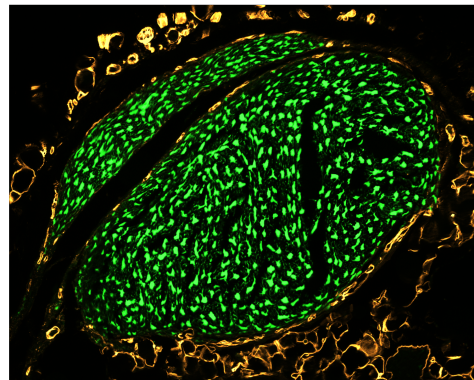

**FIGURE S3**

Supplement: NIHMS1713320-supplement-fS3.pdf [file NIHMS1713320-supplement-fS3.pdf]
